# Supplementary material for: Temporal and vertical changes in biological communities within snowpacks during melting season in Northern Japan
Source: Copernicus journal article supplement (doi:10.5194/egusphere-2025-2617), 2025-06-23
Supplement: Supplementary file 1 [file egusphere-2025-2617-supplement.pdf]

Title of the manuscript: Temporal and vertical changes in biological communities within snowpacks during melting season in Northern Japan

Authors: Masato Ono<sup>1</sup>, Kino Kobayashi<sup>2</sup>, Daiki Seto<sup>2</sup>, Fuki Konishi<sup>2</sup>, Kaito Wada<sup>3</sup>, Suzunosuke Usuba<sup>2</sup>, and Nozomu Takeuchi<sup>4</sup>

<sup>1</sup>Center for Ecological Research, Kyoto University, Shiga 520-2113, Japan

<sup>2</sup>Graduate School of Science and Engineering, Chiba University, Chiba, 263-8522, Japan

<sup>3</sup>Department of Earth Sciences, Chiba University, Chiba, 263-8522, Japan

<sup>4</sup>Department of Earth Sciences, Graduate School of Science, Chiba University, Chiba, 263-8522, Japan

This file includes nine supplementary figures. The legends are below, and all figures are on the next page.

Supplementary Figure S1: Temporal changes in (a) chlorophyll *a*, (b) tardigrades, and (c) rotifers in snow core samples. %: Percentage of chlorophyll *a* concentration and population density of each layer in the entire snowpack.

Supplementary Figure S2: Concentrations of chemical solutes excluding nutrients in rainwater. The results from samples collected tree-free area and tree-covered area are shown by white and gray bars, respectively.

Supplementary Figure S3: Concentrations of chemical solutes excluding nutrients in the elution experiments.

Supplementary Figure S4: CCA diagram of correlations between microbes and chemical solutes after the appearance of the algal-blooming snow.

Supplementary Figure S5: Correlation between cell concentrations and population densities of microbes, concentrations of chemical solutes, and dry weights of insoluble particulates in (a) the snow surface and (b) the snow pit. Significant differences ( $p < 0.01$ ) are indicated by asterisks.

Supplementary Table S1: Results of the t-test for differences in cell concentrations and population densities of microbes, concentrations of chemical solutes, and dry weights of insoluble particulates between algal-blooming snow and adjacent snow. The results for both the snow surface and the snow pit are shown. Significant differences ( $p < 0.05$ ) are highlighted in bold.

Supplementary Table S2: Results of the t-test for differences in concentrations of chemical solutes in the rainwater samples. Significant differences ( $p < 0.05$ ) are highlighted in bold.

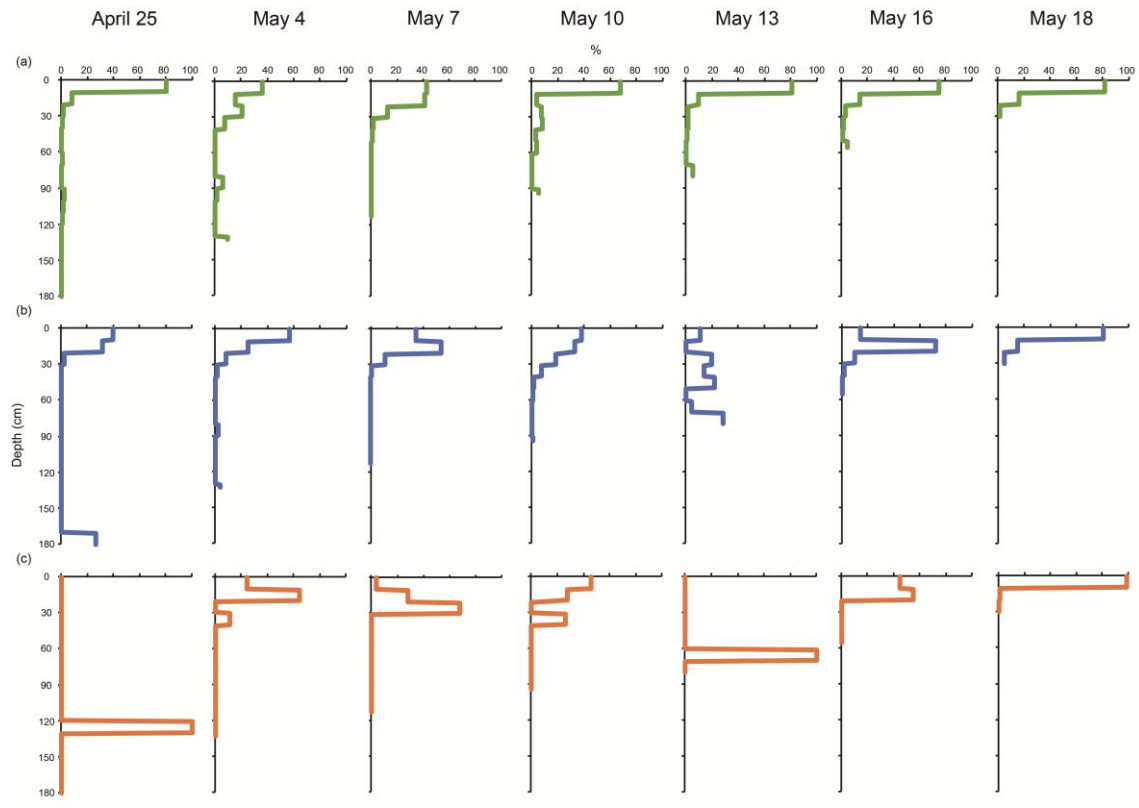

**Supplementary Figure S1: Temporal changes in (a) chlorophyll *a*, (b) tardigrades, and (c) rotifers in snow core samples. %: Percentage of chlorophyll *a* concentration and population density of each layer in the entire snow-pack.**

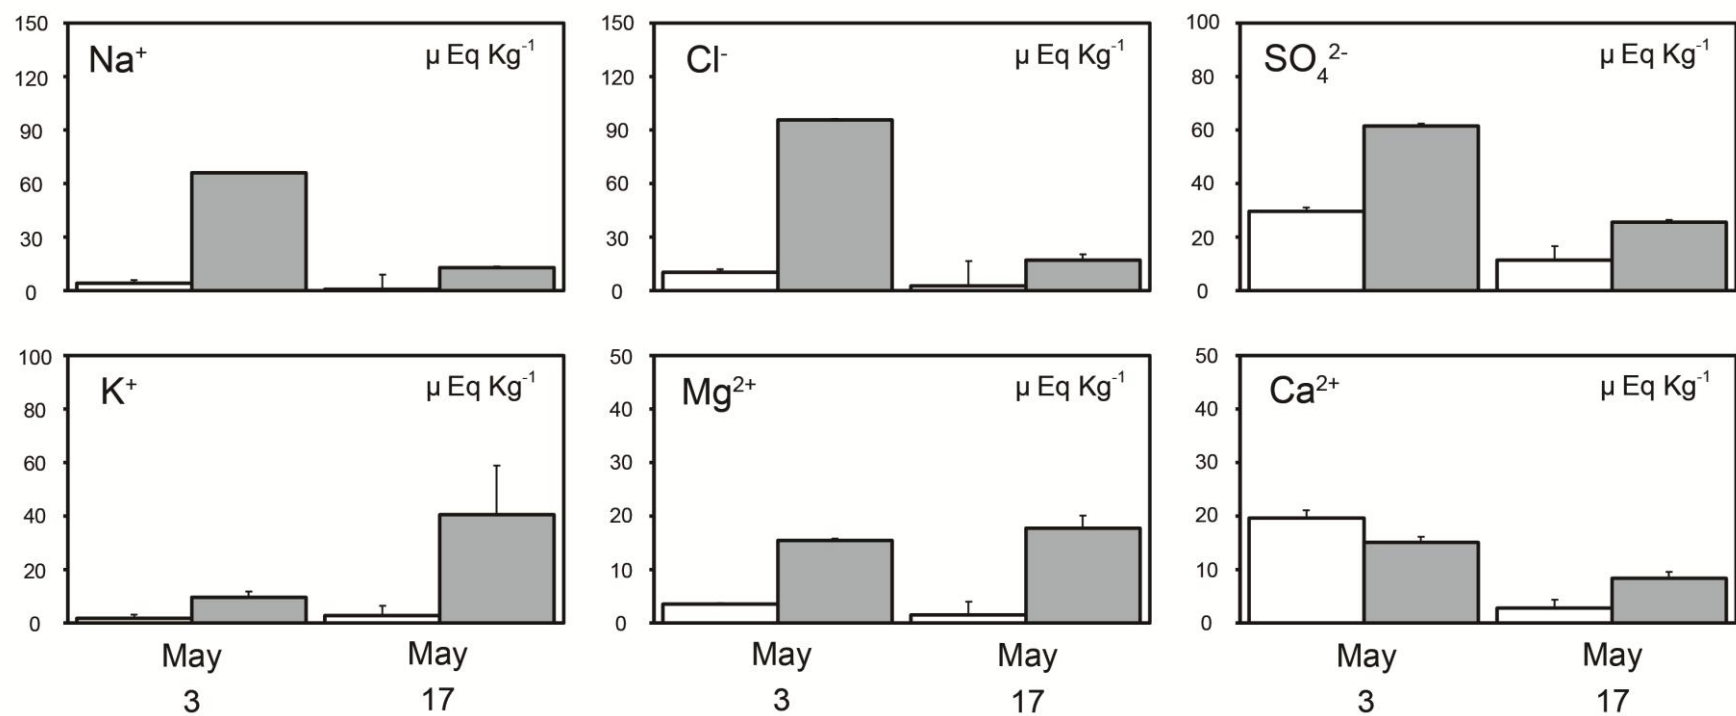

**Supplementary Figure S2: Concentrations of chemical solutes excluding nutrients in rainwater.** The results from samples collected tree-free area and tree-covered area are shown by white and gray bars, respectively.

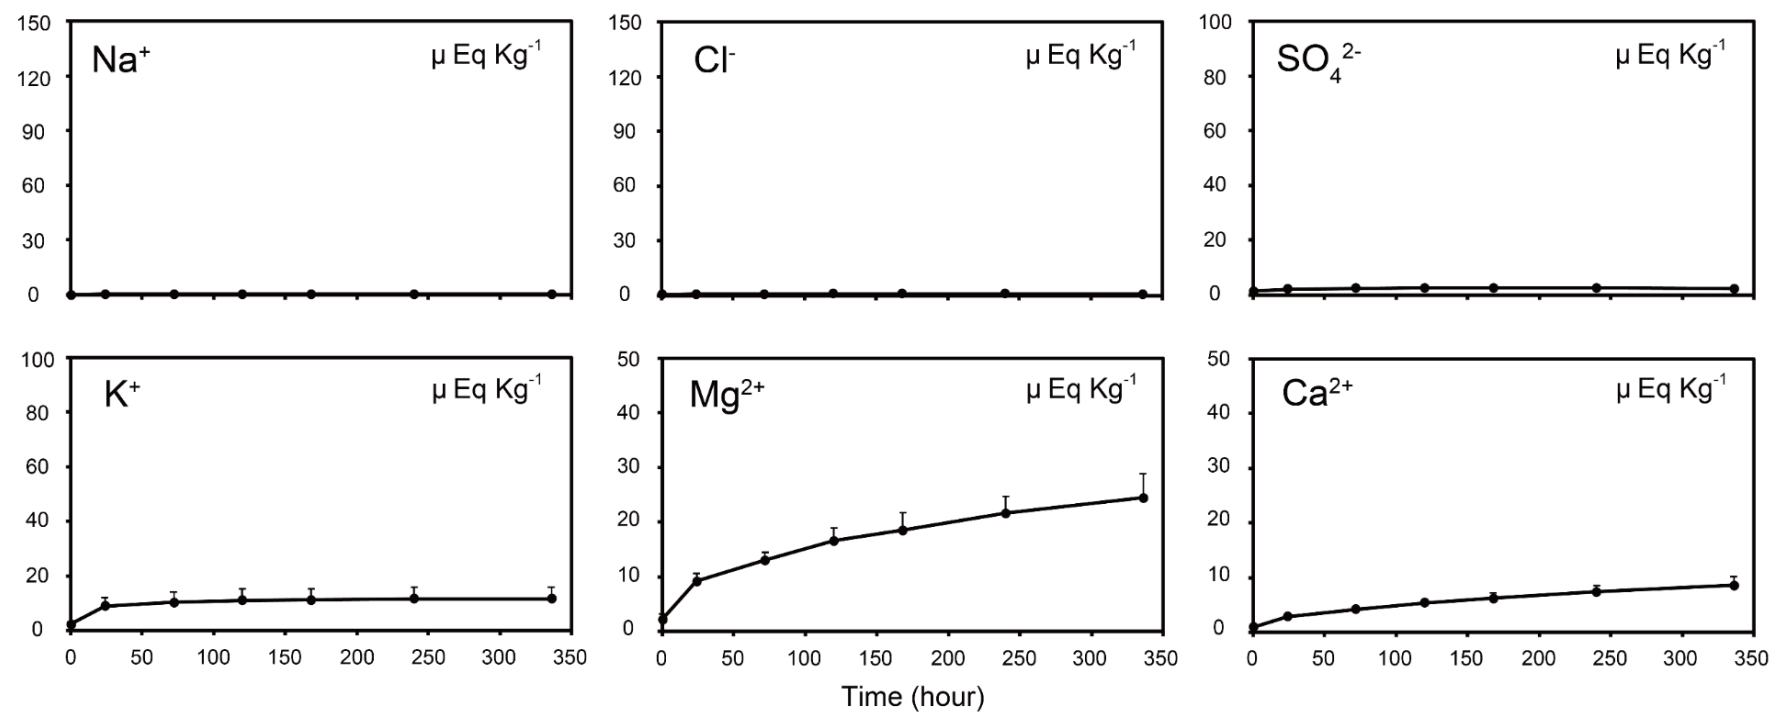

**Supplementary Figure S3: Concentrations of chemical solutes excluding nutrients in the elution experiments.**

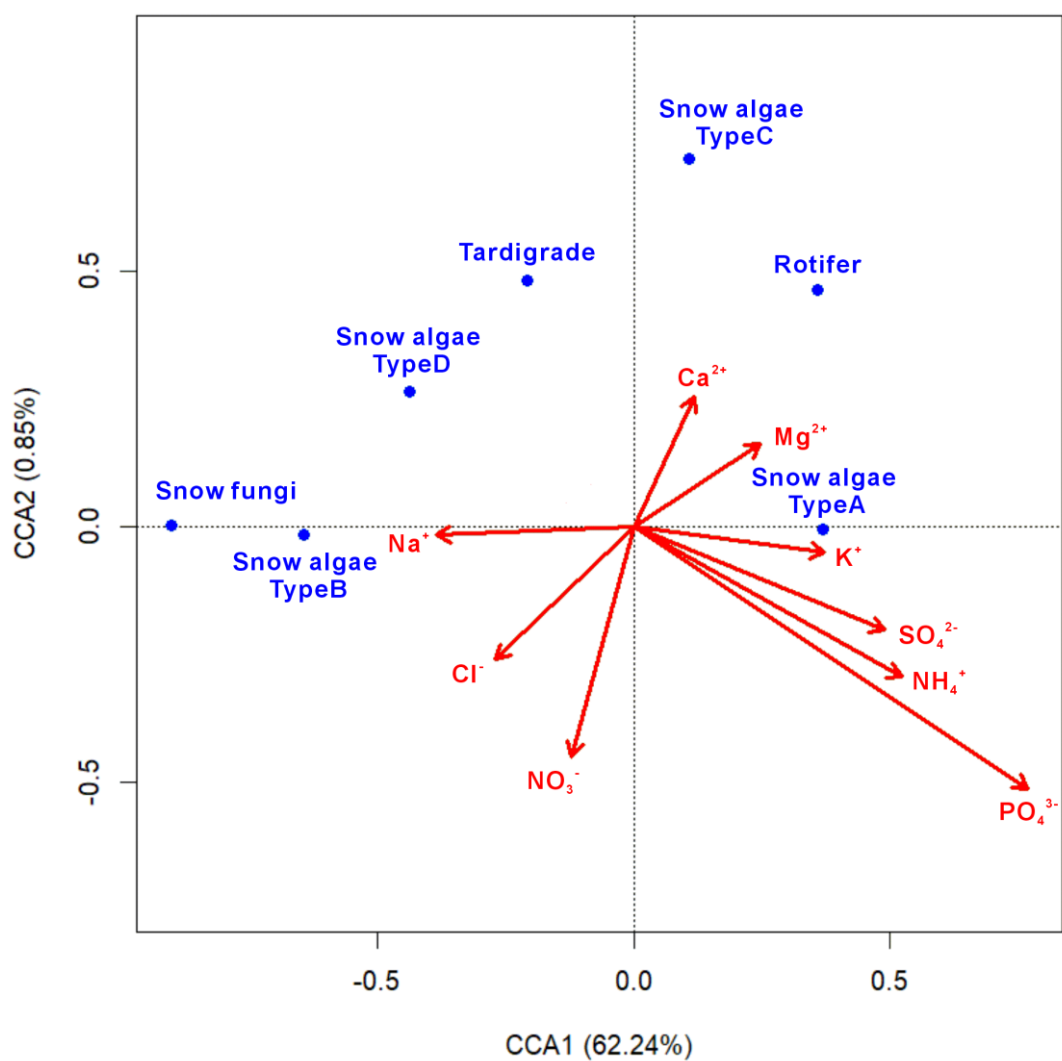

Supplementary Figure S4: CCA diagram of correlations between microbes and chemical solutes after the appearance of the algal-blooming snow.

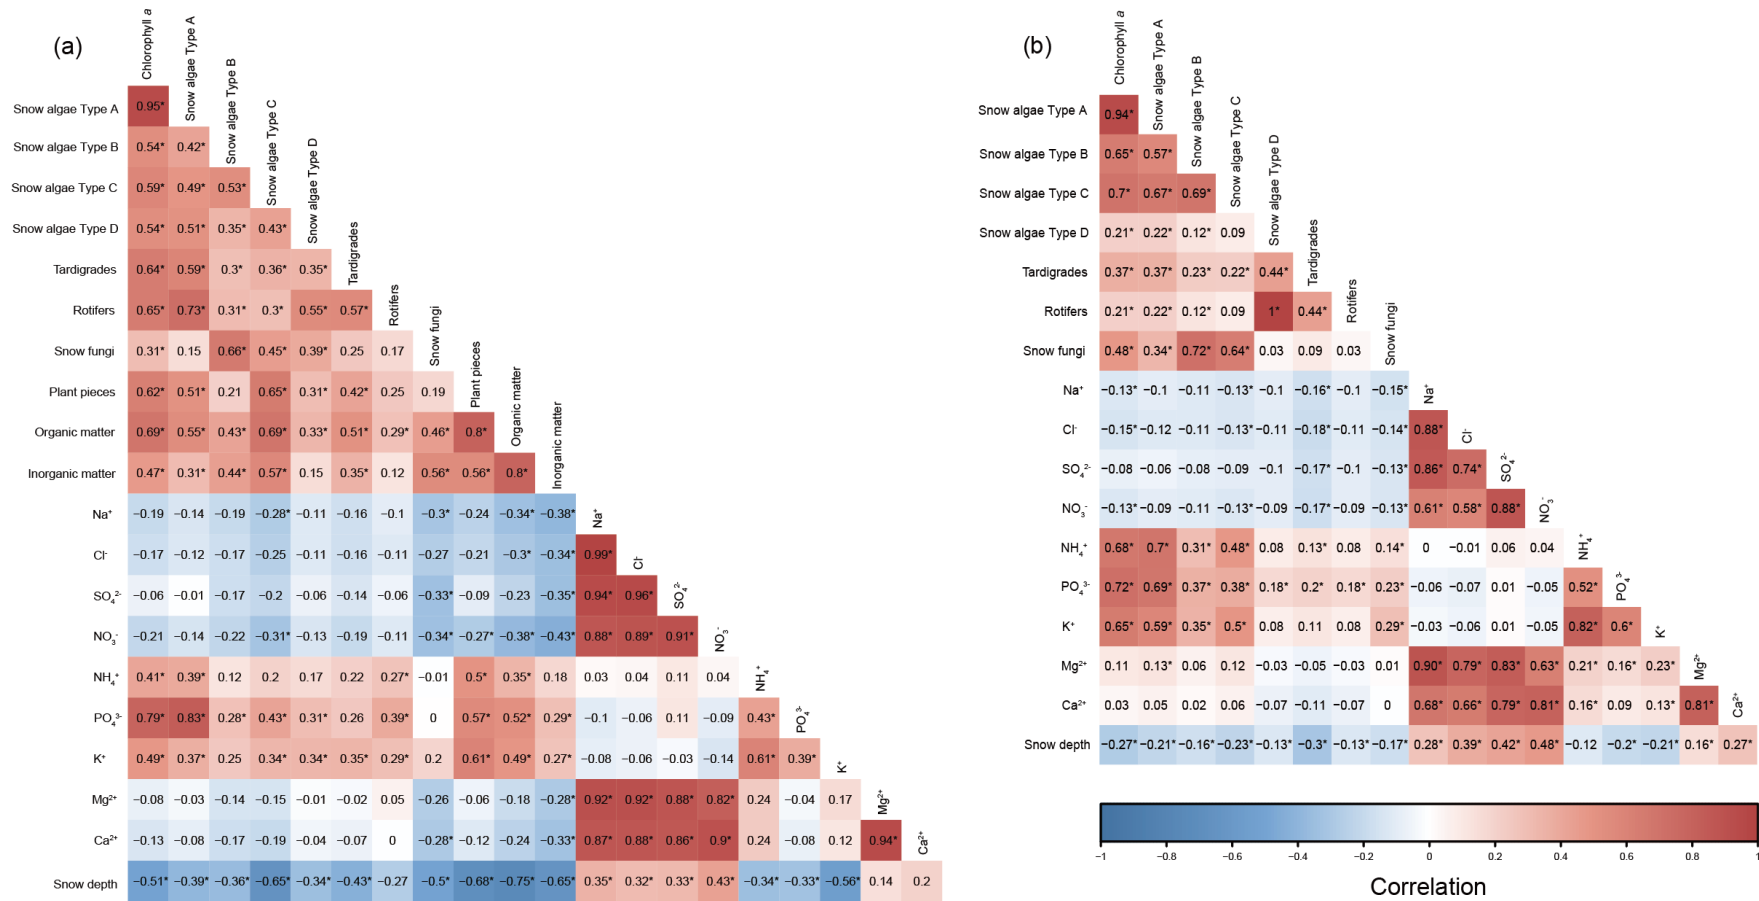

**Supplementary Figure S5: Correlation between cell concentrations and population densities of microbes, concentrations of chemical solutes, and dry weights of insoluble particulates in (a) the snow surface and (b) the snow pit. Significant differences ( $p < 0.01$ ) are indicated by asterisks.**

|                               | Surface (layer I) |              | In the snow pit (layers I-V) |              |
|-------------------------------|-------------------|--------------|------------------------------|--------------|
|                               | t                 | p            | t                            | p            |
| Chlorophyll <i>a</i>          | -4.002            | <b>0.000</b> | -1.395                       | 0.164        |
| Snow algae Type A             | -2.725            | <b>0.010</b> | -1.466                       | 0.144        |
| Snow algae Type B             | -3.679            | <b>0.001</b> | 0.293                        | 0.770        |
| Snow algae Type C             | -3.122            | <b>0.003</b> | 0.012                        | 0.990        |
| Snow algae Type D             | -1.521            | 0.138        | 0.427                        | 0.670        |
| Tardigrades                   | -2.556            | <b>0.015</b> | -1.207                       | 0.228        |
| Rotifers                      | -1.771            | 0.085        | -0.318                       | 0.751        |
| Snow fungi                    | -2.497            | <b>0.016</b> | 0.697                        | 0.487        |
| Na <sup>+</sup>               | -0.703            | 0.485        | 1.463                        | 0.144        |
| Cl <sup>-</sup>               | -0.918            | 0.363        | 1.567                        | 0.118        |
| SO <sub>4</sub> <sup>2-</sup> | -0.903            | 0.371        | 2.453                        | <b>0.015</b> |
| NO <sub>3</sub> <sup>-</sup>  | 1.362             | 0.179        | 3.468                        | <b>0.001</b> |
| NH <sub>4</sub> <sup>+</sup>  | -1.674            | 0.103        | -0.930                       | 0.353        |
| PO <sub>4</sub> <sup>3-</sup> | -1.764            | 0.086        | -0.759                       | 0.449        |
| K <sup>+</sup>                | -2.550            | <b>0.015</b> | -1.792                       | 0.074        |
| Mg <sup>2+</sup>              | -0.973            | 0.335        | -0.315                       | 0.753        |
| Ca <sup>2+</sup>              | -0.418            | 0.678        | -0.272                       | 0.786        |
| Plant litter                  | -2.833            | <b>0.007</b> |                              |              |
| Organic matter                | -4.336            | <b>0.000</b> |                              |              |
| Inorganic matter              | -3.758            | <b>0.000</b> |                              |              |
| Organic matter %              | -1.738            | 0.088        |                              |              |

**Table S1. Results of the t-test for differences in cell concentrations and population densities of microbes, concentrations of chemical solutes, and dry weights of insoluble particulates between algal-blooming snow and adjacent snow. The results for both the snow surface and the snow pit are shown. Significant differences ( $p < 0.05$ ) are highlighted in bold.**



|                               | Tree-free and tree-covered areas on May 13 |              | Tree-free and tree-covered areas on May 17 |              | May 13 and 17 at tree-free area |              | May 13 and 17 at tree-covered area |              |
|-------------------------------|--------------------------------------------|--------------|--------------------------------------------|--------------|---------------------------------|--------------|------------------------------------|--------------|
|                               | t                                          | p            | t                                          | p            | t                               | p            | t                                  | p            |
| Na <sup>+</sup>               | -8.717                                     | <b>0.012</b> | -6.335                                     | 0.021        | 5.552                           | <b>0.023</b> | 7.877                              | <b>0.012</b> |
| Cl <sup>-</sup>               | -2.713                                     | 0.065        | 1.864                                      | 0.198        | 17.886                          | <b>0.000</b> | 7.619                              | <b>0.008</b> |
| SO <sub>4</sub> <sup>2-</sup> | -1.126                                     | 0.377        | -3.683                                     | 0.066        | 1.000                           | 0.423        | -1.167                             | 0.315        |
| NO <sub>3</sub> <sup>-</sup>  | -8.117                                     | <b>0.010</b> | -15.404                                    | <b>0.000</b> | 15.405                          | <b>0.000</b> | 9.350                              | <b>0.009</b> |
| NH <sub>4</sub> <sup>+</sup>  | -10.720                                    | <b>0.006</b> | -34.111                                    | <b>0.000</b> | 2.479                           | 0.130        | 9.422                              | <b>0.011</b> |
| PO <sub>4</sub> <sup>3-</sup> | -1.257                                     | 0.307        | -1.827                                     | 0.142        | -0.420                          | 0.697        | 0.245                              | 0.825        |
| K <sup>+</sup>                | -3.032                                     | 0.069        | -2.893                                     | 0.098        | -0.628                          | 0.571        | -2.352                             | 0.135        |
| Mg <sup>2+</sup>              | -7.120                                     | <b>0.018</b> | -3.506                                     | 0.070        | 3.688                           | <b>0.048</b> | -0.466                             | 0.679        |
| Ca <sup>2+</sup>              | 3.155                                      | 0.035        | -4.842                                     | <b>0.009</b> | 13.458                          | <b>0.000</b> | 4.995                              | <b>0.009</b> |

**Table S2. Results of the t-test for differences in concentrations of chemical solutes in the rainwater samples. Significant differences ( $p < 0.05$ ) are highlighted in bold.**
